# Supplementary material for: Fungal communities decline with urbanization—more in air than in soil
Source: PubMed Central journal article supplement (PMC7784924; doi:10.1038/s41396-020-0732-1), 2020-08-05
Supplement: 41396_2020_732_MOESM1_ESM.pdf [file 41396_2020_732_MOESM1_ESM.pdf]

## Fungal communities decline with urbanization – more in air than in soil

Abrego, N., Crosier, B. Somervuo, P., Ivanova, N., Abrahamyan, A., Abdi, A., Hämäläinen, K., Junninen, K., Maunula, M., Purhonen, J. & Ovaskainen, O.

### SUPPLEMENTARY TABLES

**Supporting Table 1.** Description of the samples. The Sample ID includes information about location, date and type of the sample, so that e.g. HEL-N1-170819-A is the air (A) sample from Helsinki (HEL), natural plot 1 (N1), sampled 17<sup>th</sup> August 2019 (170819).

| Sample ID       | Site     | Plot   | Type | Latitude | Longitude | Habitat | RefinedHabitat |
|-----------------|----------|--------|------|----------|-----------|---------|----------------|
| HEL-N1-170819-A | Helsinki | HEL-N1 | Air  | 60.29107 | 24.45114  | Natural | NaturalCore    |
| HEL-N1-170819-S | Helsinki | HEL-N1 | Soil | 60.29107 | 24.45114  | Natural | NaturalCore    |
| HEL-N1-180819-A | Helsinki | HEL-N1 | Air  | 60.29107 | 24.45114  | Natural | NaturalCore    |
| HEL-N1-180819-S | Helsinki | HEL-N1 | Soil | 60.29107 | 24.45114  | Natural | NaturalCore    |
| HEL-N1-220819-A | Helsinki | HEL-N1 | Air  | 60.29107 | 24.45114  | Natural | NaturalCore    |
| HEL-N1-220819-S | Helsinki | HEL-N1 | Soil | 60.29107 | 24.45114  | Natural | NaturalCore    |
| HEL-N2-170819-A | Helsinki | HEL-N2 | Air  | 60.2943  | 24.51658  | Natural | NaturalCore    |
| HEL-N2-170819-S | Helsinki | HEL-N2 | Soil | 60.2943  | 24.51658  | Natural | NaturalCore    |
| HEL-N2-180819-A | Helsinki | HEL-N2 | Air  | 60.2943  | 24.51658  | Natural | NaturalCore    |
| HEL-N2-180819-S | Helsinki | HEL-N2 | Soil | 60.2943  | 24.51658  | Natural | NaturalCore    |
| HEL-N2-220819-A | Helsinki | HEL-N2 | Air  | 60.2943  | 24.51658  | Natural | NaturalCore    |
| HEL-N2-220819-S | Helsinki | HEL-N2 | Soil | 60.2943  | 24.51658  | Natural | NaturalCore    |
| HEL-N3-170819-A | Helsinki | HEL-N3 | Air  | 60.23775 | 24.66243  | Natural | NaturalEdge    |
| HEL-N3-170819-S | Helsinki | HEL-N3 | Soil | 60.23775 | 24.66243  | Natural | NaturalEdge    |
| HEL-N3-180819-A | Helsinki | HEL-N3 | Air  | 60.23775 | 24.66243  | Natural | NaturalEdge    |
| HEL-N3-180819-S | Helsinki | HEL-N3 | Soil | 60.23775 | 24.66243  | Natural | NaturalEdge    |
| HEL-N3-220819-A | Helsinki | HEL-N3 | Air  | 60.23775 | 24.66243  | Natural | NaturalEdge    |
| HEL-N3-220819-S | Helsinki | HEL-N3 | Soil | 60.23775 | 24.66243  | Natural | NaturalEdge    |
| HEL-U1-160819-A | Helsinki | HEL-U1 | Air  | 60.15399 | 24.9422   | Urban   | UrbanCore      |
| HEL-U1-160819-S | Helsinki | HEL-U1 | Soil | 60.15399 | 24.9422   | Urban   | UrbanCore      |
| HEL-U1-200819-A | Helsinki | HEL-U1 | Air  | 60.15399 | 24.9422   | Urban   | UrbanCore      |
| HEL-U1-200819-S | Helsinki | HEL-U1 | Soil | 60.15399 | 24.9422   | Urban   | UrbanCore      |
| HEL-U1-210819-A | Helsinki | HEL-U1 | Air  | 60.15399 | 24.9422   | Urban   | UrbanCore      |
| HEL-U1-210819-S | Helsinki | HEL-U1 | Soil | 60.15399 | 24.9422   | Urban   | UrbanCore      |
| HEL-U2-160819-A | Helsinki | HEL-U2 | Air  | 60.1724  | 24.95002  | Urban   | UrbanCore      |
| HEL-U2-160819-S | Helsinki | HEL-U2 | Soil | 60.1724  | 24.95002  | Urban   | UrbanCore      |
| HEL-U2-200819-A | Helsinki | HEL-U2 | Air  | 60.1724  | 24.95002  | Urban   | UrbanCore      |
| HEL-U2-200819-S | Helsinki | HEL-U2 | Soil | 60.1724  | 24.95002  | Urban   | UrbanCore      |
| HEL-U2-210819-A | Helsinki | HEL-U2 | Air  | 60.1724  | 24.95002  | Urban   | UrbanCore      |
| HEL-U2-210819-S | Helsinki | HEL-U2 | Soil | 60.1724  | 24.95002  | Urban   | UrbanCore      |
| HEL-U3-160819-A | Helsinki | HEL-U3 | Air  | 60.22722 | 25.01652  | Urban   | UrbanEdge      |

|                 |           |        |      |          |          |         |             |
|-----------------|-----------|--------|------|----------|----------|---------|-------------|
| HEL-U3-160819-S | Helsinki  | HEL-U3 | Soil | 60.22722 | 25.01652 | Urban   | UrbanEdge   |
| HEL-U3-200819-A | Helsinki  | HEL-U3 | Air  | 60.22722 | 25.01652 | Urban   | UrbanEdge   |
| HEL-U3-200819-S | Helsinki  | HEL-U3 | Soil | 60.22722 | 25.01652 | Urban   | UrbanEdge   |
| HEL-U3-210819-A | Helsinki  | HEL-U3 | Air  | 60.22722 | 25.01652 | Urban   | UrbanEdge   |
| HEL-U3-210819-S | Helsinki  | HEL-U3 | Soil | 60.22722 | 25.01652 | Urban   | UrbanEdge   |
| JOE-N1-170819-A | Joensuu   | JOE-N1 | Air  | 62.61314 | 30.1733  | Natural | NaturalCore |
| JOE-N1-170819-S | Joensuu   | JOE-N1 | Soil | 62.61314 | 30.1733  | Natural | NaturalCore |
| JOE-N1-180819-A | Joensuu   | JOE-N1 | Air  | 62.61314 | 30.1733  | Natural | NaturalCore |
| JOE-N1-180819-S | Joensuu   | JOE-N1 | Soil | 62.61314 | 30.1733  | Natural | NaturalCore |
| JOE-N1-220819-A | Joensuu   | JOE-N1 | Air  | 62.61314 | 30.1733  | Natural | NaturalCore |
| JOE-N1-220819-S | Joensuu   | JOE-N1 | Soil | 62.61314 | 30.1733  | Natural | NaturalCore |
| JOE-N2-170819-A | Joensuu   | JOE-N2 | Air  | 62.618   | 30.16288 | Natural | NaturalCore |
| JOE-N2-170819-S | Joensuu   | JOE-N2 | Soil | 62.618   | 30.16288 | Natural | NaturalCore |
| JOE-N2-180819-A | Joensuu   | JOE-N2 | Air  | 62.618   | 30.16288 | Natural | NaturalCore |
| JOE-N2-180819-S | Joensuu   | JOE-N2 | Soil | 62.618   | 30.16288 | Natural | NaturalCore |
| JOE-N2-230819-A | Joensuu   | JOE-N2 | Air  | 62.618   | 30.16288 | Natural | NaturalCore |
| JOE-N2-230819-S | Joensuu   | JOE-N2 | Soil | 62.618   | 30.16288 | Natural | NaturalCore |
| JOE-N3-170819-A | Joensuu   | JOE-N3 | Air  | 62.62875 | 30.10211 | Natural | NaturalEdge |
| JOE-N3-170819-S | Joensuu   | JOE-N3 | Soil | 62.62875 | 30.10211 | Natural | NaturalEdge |
| JOE-N3-180819-A | Joensuu   | JOE-N3 | Air  | 62.62875 | 30.10211 | Natural | NaturalEdge |
| JOE-N3-180819-S | Joensuu   | JOE-N3 | Soil | 62.62875 | 30.10211 | Natural | NaturalEdge |
| JOE-N3-220819-A | Joensuu   | JOE-N3 | Air  | 62.62875 | 30.10211 | Natural | NaturalEdge |
| JOE-N3-220819-S | Joensuu   | JOE-N3 | Soil | 62.62875 | 30.10211 | Natural | NaturalEdge |
| JOE-U1-160819-A | Joensuu   | JOE-U1 | Air  | 62.60496 | 29.74068 | Urban   | UrbanCore   |
| JOE-U1-160819-S | Joensuu   | JOE-U1 | Soil | 62.60496 | 29.74068 | Urban   | UrbanCore   |
| JOE-U1-200819-A | Joensuu   | JOE-U1 | Air  | 62.60496 | 29.74068 | Urban   | UrbanCore   |
| JOE-U1-200819-S | Joensuu   | JOE-U1 | Soil | 62.60496 | 29.74068 | Urban   | UrbanCore   |
| JOE-U1-210819-A | Joensuu   | JOE-U1 | Air  | 62.60496 | 29.74068 | Urban   | UrbanCore   |
| JOE-U1-210819-S | Joensuu   | JOE-U1 | Soil | 62.60496 | 29.74068 | Urban   | UrbanCore   |
| JOE-U2-160819-A | Joensuu   | JOE-U2 | Air  | 62.61026 | 29.78303 | Urban   | UrbanCore   |
| JOE-U2-160819-S | Joensuu   | JOE-U2 | Soil | 62.61026 | 29.78303 | Urban   | UrbanCore   |
| JOE-U2-200819-A | Joensuu   | JOE-U2 | Air  | 62.61026 | 29.78303 | Urban   | UrbanCore   |
| JOE-U2-200819-S | Joensuu   | JOE-U2 | Soil | 62.61026 | 29.78303 | Urban   | UrbanCore   |
| JOE-U2-210819-A | Joensuu   | JOE-U2 | Air  | 62.61026 | 29.78303 | Urban   | UrbanCore   |
| JOE-U2-210819-S | Joensuu   | JOE-U2 | Soil | 62.61026 | 29.78303 | Urban   | UrbanCore   |
| JOE-U3-160819-A | Joensuu   | JOE-U3 | Air  | 62.63427 | 29.89303 | Urban   | UrbanEdge   |
| JOE-U3-160819-S | Joensuu   | JOE-U3 | Soil | 62.63427 | 29.89303 | Urban   | UrbanEdge   |
| JOE-U3-200819-A | Joensuu   | JOE-U3 | Air  | 62.63427 | 29.89303 | Urban   | UrbanEdge   |
| JOE-U3-200819-S | Joensuu   | JOE-U3 | Soil | 62.63427 | 29.89303 | Urban   | UrbanEdge   |
| JOE-U3-210819-A | Joensuu   | JOE-U3 | Air  | 62.63427 | 29.89303 | Urban   | UrbanEdge   |
| JOE-U3-210819-S | Joensuu   | JOE-U3 | Soil | 62.63427 | 29.89303 | Urban   | UrbanEdge   |
| JYV-N1-170819-A | Jyväskylä | JYV-N1 | Air  | 62.14443 | 25.73463 | Natural | NaturalEdge |
| JYV-N1-170819-S | Jyväskylä | JYV-N1 | Soil | 62.14443 | 25.73463 | Natural | NaturalEdge |
| JYV-N1-180819-A | Jyväskylä | JYV-N1 | Air  | 62.14443 | 25.73463 | Natural | NaturalEdge |
| JYV-N1-180819-S | Jyväskylä | JYV-N1 | Soil | 62.14443 | 25.73463 | Natural | NaturalEdge |
| JYV-N1-220819-A | Jyväskylä | JYV-N1 | Air  | 62.14443 | 25.73463 | Natural | NaturalEdge |

|                 |           |        |      |          |          |         |             |
|-----------------|-----------|--------|------|----------|----------|---------|-------------|
| JYV-N1-220819-S | Jyväskylä | JYV-N1 | Soil | 62.14443 | 25.73463 | Natural | NaturalEdge |
| JYV-N2-170819-A | Jyväskylä | JYV-N2 | Air  | 62.21892 | 25.59721 | Natural | NaturalCore |
| JYV-N2-170819-S | Jyväskylä | JYV-N2 | Soil | 62.21892 | 25.59721 | Natural | NaturalCore |
| JYV-N2-180819-A | Jyväskylä | JYV-N2 | Air  | 62.21892 | 25.59721 | Natural | NaturalCore |
| JYV-N2-180819-S | Jyväskylä | JYV-N2 | Soil | 62.21892 | 25.59721 | Natural | NaturalCore |
| JYV-N2-220819-A | Jyväskylä | JYV-N2 | Air  | 62.21892 | 25.59721 | Natural | NaturalCore |
| JYV-N2-220819-S | Jyväskylä | JYV-N2 | Soil | 62.21892 | 25.59721 | Natural | NaturalCore |
| JYV-N3-170819-A | Jyväskylä | JYV-N3 | Air  | 62.20428 | 25.60934 | Natural | NaturalCore |
| JYV-N3-170819-S | Jyväskylä | JYV-N3 | Soil | 62.20428 | 25.60934 | Natural | NaturalCore |
| JYV-N3-180819-A | Jyväskylä | JYV-N3 | Air  | 62.20428 | 25.60934 | Natural | NaturalCore |
| JYV-N3-180819-S | Jyväskylä | JYV-N3 | Soil | 62.20428 | 25.60934 | Natural | NaturalCore |
| JYV-N3-220819-A | Jyväskylä | JYV-N3 | Air  | 62.20428 | 25.60934 | Natural | NaturalCore |
| JYV-N3-220819-S | Jyväskylä | JYV-N3 | Soil | 62.20428 | 25.60934 | Natural | NaturalCore |
| JYV-U1-160819-A | Jyväskylä | JYV-U1 | Air  | 62.23031 | 25.74405 | Urban   | UrbanCore   |
| JYV-U1-160819-S | Jyväskylä | JYV-U1 | Soil | 62.23031 | 25.74405 | Urban   | UrbanCore   |
| JYV-U1-200819-A | Jyväskylä | JYV-U1 | Air  | 62.23031 | 25.74405 | Urban   | UrbanCore   |
| JYV-U1-200819-S | Jyväskylä | JYV-U1 | Soil | 62.23031 | 25.74405 | Urban   | UrbanCore   |
| JYV-U1-210819-A | Jyväskylä | JYV-U1 | Air  | 62.23031 | 25.74405 | Urban   | UrbanCore   |
| JYV-U1-210819-S | Jyväskylä | JYV-U1 | Soil | 62.23031 | 25.74405 | Urban   | UrbanCore   |
| JYV-U2-160819-A | Jyväskylä | JYV-U2 | Air  | 62.22907 | 25.71911 | Urban   | UrbanCore   |
| JYV-U2-160819-S | Jyväskylä | JYV-U2 | Soil | 62.22907 | 25.71911 | Urban   | UrbanCore   |
| JYV-U2-200819-A | Jyväskylä | JYV-U2 | Air  | 62.22907 | 25.71911 | Urban   | UrbanCore   |
| JYV-U2-200819-S | Jyväskylä | JYV-U2 | Soil | 62.22907 | 25.71911 | Urban   | UrbanCore   |
| JYV-U2-210819-A | Jyväskylä | JYV-U2 | Air  | 62.22907 | 25.71911 | Urban   | UrbanCore   |
| JYV-U2-210819-S | Jyväskylä | JYV-U2 | Soil | 62.22907 | 25.71911 | Urban   | UrbanCore   |
| JYV-U3-160819-A | Jyväskylä | JYV-U3 | Air  | 62.15381 | 25.75899 | Urban   | UrbanEdge   |
| JYV-U3-160819-S | Jyväskylä | JYV-U3 | Soil | 62.15381 | 25.75899 | Urban   | UrbanEdge   |
| JYV-U3-200819-A | Jyväskylä | JYV-U3 | Air  | 62.15381 | 25.75899 | Urban   | UrbanEdge   |
| JYV-U3-200819-S | Jyväskylä | JYV-U3 | Soil | 62.15381 | 25.75899 | Urban   | UrbanEdge   |
| JYV-U3-210819-A | Jyväskylä | JYV-U3 | Air  | 62.15381 | 25.75899 | Urban   | UrbanEdge   |
| JYV-U3-210819-S | Jyväskylä | JYV-U3 | Soil | 62.15381 | 25.75899 | Urban   | UrbanEdge   |
| LAH-N1-170819-A | Lahti     | LAH-N1 | Air  | 61.10316 | 25.7946  | Natural | NaturalCore |
| LAH-N1-170819-S | Lahti     | LAH-N1 | Soil | 61.10316 | 25.7946  | Natural | NaturalCore |
| LAH-N1-180819-A | Lahti     | LAH-N1 | Air  | 61.10316 | 25.7946  | Natural | NaturalCore |
| LAH-N1-180819-S | Lahti     | LAH-N1 | Soil | 61.10316 | 25.7946  | Natural | NaturalCore |
| LAH-N1-220819-A | Lahti     | LAH-N1 | Air  | 61.10316 | 25.7946  | Natural | NaturalCore |
| LAH-N1-220819-S | Lahti     | LAH-N1 | Soil | 61.10316 | 25.7946  | Natural | NaturalCore |
| LAH-N2-170819-A | Lahti     | LAH-N2 | Air  | 61.09949 | 25.80648 | Natural | NaturalCore |
| LAH-N2-170819-S | Lahti     | LAH-N2 | Soil | 61.09949 | 25.80648 | Natural | NaturalCore |
| LAH-N2-180819-A | Lahti     | LAH-N2 | Air  | 61.09949 | 25.80648 | Natural | NaturalCore |
| LAH-N2-180819-S | Lahti     | LAH-N2 | Soil | 61.09949 | 25.80648 | Natural | NaturalCore |
| LAH-N2-220819-A | Lahti     | LAH-N2 | Air  | 61.09949 | 25.80648 | Natural | NaturalCore |
| LAH-N2-220819-S | Lahti     | LAH-N2 | Soil | 61.09949 | 25.80648 | Natural | NaturalCore |
| LAH-N3-170819-A | Lahti     | LAH-N3 | Air  | 61.02676 | 25.79969 | Natural | NaturalEdge |
| LAH-N3-170819-S | Lahti     | LAH-N3 | Soil | 61.02676 | 25.79969 | Natural | NaturalEdge |
| LAH-N3-180819-A | Lahti     | LAH-N3 | Air  | 61.02676 | 25.79969 | Natural | NaturalEdge |

|                 |         |        |      |          |          |         |             |
|-----------------|---------|--------|------|----------|----------|---------|-------------|
| LAH-N3-180819-S | Lahti   | LAH-N3 | Soil | 61.02676 | 25.79969 | Natural | NaturalEdge |
| LAH-N3-220819-A | Lahti   | LAH-N3 | Air  | 61.02676 | 25.79969 | Natural | NaturalEdge |
| LAH-N3-220819-S | Lahti   | LAH-N3 | Soil | 61.02676 | 25.79969 | Natural | NaturalEdge |
| LAH-U1-160819-A | Lahti   | LAH-U1 | Air  | 60.96621 | 25.6525  | Urban   | UrbanCore   |
| LAH-U1-160819-S | Lahti   | LAH-U1 | Soil | 60.96621 | 25.6525  | Urban   | UrbanCore   |
| LAH-U1-200819-A | Lahti   | LAH-U1 | Air  | 60.96621 | 25.6525  | Urban   | UrbanCore   |
| LAH-U1-200819-S | Lahti   | LAH-U1 | Soil | 60.96621 | 25.6525  | Urban   | UrbanCore   |
| LAH-U1-210819-A | Lahti   | LAH-U1 | Air  | 60.96621 | 25.6525  | Urban   | UrbanCore   |
| LAH-U1-210819-S | Lahti   | LAH-U1 | Soil | 60.96621 | 25.6525  | Urban   | UrbanCore   |
| LAH-U2-160819-A | Lahti   | LAH-U2 | Air  | 61.00863 | 25.66531 | Urban   | UrbanCore   |
| LAH-U2-160819-S | Lahti   | LAH-U2 | Soil | 61.00863 | 25.66531 | Urban   | UrbanCore   |
| LAH-U2-200819-A | Lahti   | LAH-U2 | Air  | 61.00863 | 25.66531 | Urban   | UrbanCore   |
| LAH-U2-200819-S | Lahti   | LAH-U2 | Soil | 61.00863 | 25.66531 | Urban   | UrbanCore   |
| LAH-U2-210819-A | Lahti   | LAH-U2 | Air  | 61.00863 | 25.66531 | Urban   | UrbanCore   |
| LAH-U2-210819-S | Lahti   | LAH-U2 | Soil | 61.00863 | 25.66531 | Urban   | UrbanCore   |
| LAH-U3-160819-A | Lahti   | LAH-U3 | Air  | 61.01642 | 25.80325 | Urban   | UrbanEdge   |
| LAH-U3-160819-S | Lahti   | LAH-U3 | Soil | 61.01642 | 25.80325 | Urban   | UrbanEdge   |
| LAH-U3-200819-A | Lahti   | LAH-U3 | Air  | 61.01642 | 25.80325 | Urban   | UrbanEdge   |
| LAH-U3-200819-S | Lahti   | LAH-U3 | Soil | 61.01642 | 25.80325 | Urban   | UrbanEdge   |
| LAH-U3-210819-A | Lahti   | LAH-U3 | Air  | 61.01642 | 25.80325 | Urban   | UrbanEdge   |
| LAH-U3-210819-S | Lahti   | LAH-U3 | Soil | 61.01642 | 25.80325 | Urban   | UrbanEdge   |
| TAM-N1-170819-A | Tampere | TAM-N1 | Air  | 61.50889 | 23.98333 | Natural | NaturalCore |
| TAM-N1-170819-S | Tampere | TAM-N1 | Soil | 61.50889 | 23.98333 | Natural | NaturalCore |
| TAM-N1-180819-A | Tampere | TAM-N1 | Air  | 61.50889 | 23.98333 | Natural | NaturalCore |
| TAM-N1-180819-S | Tampere | TAM-N1 | Soil | 61.50889 | 23.98333 | Natural | NaturalCore |
| TAM-N1-220819-A | Tampere | TAM-N1 | Air  | 61.50889 | 23.98333 | Natural | NaturalCore |
| TAM-N1-220819-S | Tampere | TAM-N1 | Soil | 61.50889 | 23.98333 | Natural | NaturalCore |
| TAM-N2-170819-A | Tampere | TAM-N2 | Air  | 61.5378  | 24.02935 | Natural | NaturalCore |
| TAM-N2-170819-S | Tampere | TAM-N2 | Soil | 61.5378  | 24.02935 | Natural | NaturalCore |
| TAM-N2-180819-A | Tampere | TAM-N2 | Air  | 61.5378  | 24.02935 | Natural | NaturalCore |
| TAM-N2-180819-S | Tampere | TAM-N2 | Soil | 61.5378  | 24.02935 | Natural | NaturalCore |
| TAM-N2-220819-A | Tampere | TAM-N2 | Air  | 61.5378  | 24.02935 | Natural | NaturalCore |
| TAM-N2-220819-S | Tampere | TAM-N2 | Soil | 61.5378  | 24.02935 | Natural | NaturalCore |
| TAM-N3-170819-A | Tampere | TAM-N3 | Air  | 61.59444 | 24.11595 | Natural | NaturalEdge |
| TAM-N3-170819-S | Tampere | TAM-N3 | Soil | 61.59444 | 24.11595 | Natural | NaturalEdge |
| TAM-N3-180819-A | Tampere | TAM-N3 | Air  | 61.59444 | 24.11595 | Natural | NaturalEdge |
| TAM-N3-180819-S | Tampere | TAM-N3 | Soil | 61.59444 | 24.11595 | Natural | NaturalEdge |
| TAM-N3-220819-A | Tampere | TAM-N3 | Air  | 61.59444 | 24.11595 | Natural | NaturalEdge |
| TAM-N3-220819-S | Tampere | TAM-N3 | Soil | 61.59444 | 24.11595 | Natural | NaturalEdge |
| TAM-U1-160819-A | Tampere | TAM-U1 | Air  | 61.49972 | 23.76167 | Urban   | UrbanCore   |
| TAM-U1-160819-S | Tampere | TAM-U1 | Soil | 61.49972 | 23.76167 | Urban   | UrbanCore   |
| TAM-U1-200819-A | Tampere | TAM-U1 | Air  | 61.49972 | 23.76167 | Urban   | UrbanCore   |
| TAM-U1-200819-S | Tampere | TAM-U1 | Soil | 61.49972 | 23.76167 | Urban   | UrbanCore   |
| TAM-U1-210819-A | Tampere | TAM-U1 | Air  | 61.49972 | 23.76167 | Urban   | UrbanCore   |
| TAM-U1-210819-S | Tampere | TAM-U1 | Soil | 61.49972 | 23.76167 | Urban   | UrbanCore   |
| TAM-U2-160819-A | Tampere | TAM-U2 | Air  | 61.50356 | 23.7489  | Urban   | UrbanCore   |

|                 |         |        |      |          |          |       |           |
|-----------------|---------|--------|------|----------|----------|-------|-----------|
| TAM-U2-160819-S | Tampere | TAM-U2 | Soil | 61.50356 | 23.7489  | Urban | UrbanCore |
| TAM-U2-200819-A | Tampere | TAM-U2 | Air  | 61.50356 | 23.7489  | Urban | UrbanCore |
| TAM-U2-200819-S | Tampere | TAM-U2 | Soil | 61.50356 | 23.7489  | Urban | UrbanCore |
| TAM-U2-210819-A | Tampere | TAM-U2 | Air  | 61.50356 | 23.7489  | Urban | UrbanCore |
| TAM-U2-210819-S | Tampere | TAM-U2 | Soil | 61.50356 | 23.7489  | Urban | UrbanCore |
| TAM-U3-160819-A | Tampere | TAM-U3 | Air  | 61.44282 | 23.86826 | Urban | UrbanEdge |
| TAM-U3-160819-S | Tampere | TAM-U3 | Soil | 61.44282 | 23.86826 | Urban | UrbanEdge |
| TAM-U3-200819-A | Tampere | TAM-U3 | Air  | 61.44282 | 23.86826 | Urban | UrbanEdge |
| TAM-U3-200819-S | Tampere | TAM-U3 | Soil | 61.44282 | 23.86826 | Urban | UrbanEdge |
| TAM-U3-210819-A | Tampere | TAM-U3 | Air  | 61.44282 | 23.86826 | Urban | UrbanEdge |
| TAM-U3-210819-S | Tampere | TAM-U3 | Soil | 61.44282 | 23.86826 | Urban | UrbanEdge |

**Supporting Table 2. Outputs from the PERMANOVA analyses.** Outputs from the analyses applied to all data (A), or air (B) and soil (C) separately. These analyses correspond respectively to Figure 2a, Figure 2b, and Figure 2c from the main paper.

#### A. All data

| Variable              | Degrees of freedom | Sums of squares | Mean squares | F- statistic | R <sup>2</sup> | p (F-based) |
|-----------------------|--------------------|-----------------|--------------|--------------|----------------|-------------|
| Sample type           | 1                  | 208412          | 208412       | 28.7002      | 0.12534        | 0.001       |
| Habitat               | 1                  | 38593           | 38593        | 5.3146       | 0.02321        | 0.001       |
| Site                  | 4                  | 62858           | 15715        | 2.1640       | 0.03780        | 0.001       |
| Plot                  | 24                 | 224339          | 9347         | 1.2872       | 0.13492        | 0.002       |
| Sample type x Habitat | 1                  | 30365           | 30365        | 4.1816       | 0.01826        | 0.001       |
| Sample type x Site    | 4                  | 59363           | 14841        | 2.0437       | 0.03570        | 0.002       |
| Sample type x Plot    | 24                 | 210975          | 8791         | 1.2105       | 0.12688        | 0.004       |
| Residuals             | 114                | 827833          | 7262         |              | 0.49787        |             |
| Total                 | 173                | 1662738         |              |              | 1.00000        |             |

#### B. Air

| Variable  | Degrees of freedom | Sums of squares | Mean squares | F- statistic | R <sup>2</sup> | p (F-based) |
|-----------|--------------------|-----------------|--------------|--------------|----------------|-------------|
| Habitat   | 1                  | 26916           | 26915.6      | 2.7292       | 0.02796        | 0.002       |
| Site      | 4                  | 79243           | 19810.6      | 2.0088       | 0.08233        | 0.001       |
| Plot      | 24                 | 264605          | 11025.2      | 1.1180       | 0.27492        | 0.032       |
| Residuals | 60                 | 591716          | 9861.9       |              | 0.61478        |             |
| Total     | 89                 | 962479          |              |              | 1.00000        |             |

#### C. Soil

| Variable | Degrees of freedom | Sums of squares | Mean squares | F- statistic | R <sup>2</sup> | p (F-based) |
|----------|--------------------|-----------------|--------------|--------------|----------------|-------------|
|----------|--------------------|-----------------|--------------|--------------|----------------|-------------|

|                  |    |        |       |        |         |       |
|------------------|----|--------|-------|--------|---------|-------|
| <b>Habitat</b>   | 1  | 42667  | 42667 | 9.7580 | 0.08675 | 0.001 |
| <b>Site</b>      | 4  | 42892  | 10723 | 2.4524 | 0.08721 | 0.001 |
| <b>Plot</b>      | 24 | 170171 | 7090  | 1.6216 | 0.34598 | 0.001 |
| <b>Residuals</b> | 54 | 236117 | 4373  |        | 0.48006 |       |
| <b>Total</b>     | 83 | 491847 |       |        | 1.00000 |       |

**Supporting Table 3. Outputs from the generalized linear mixed models fitted to the OTU richness data (A) and DNA abundance data (B).** The models with lowest AIC values are indicated with an asterisk (\*).

**A. Outputs from the models applied to the OTU richness data.**

| Fixed effects included in the model                                                                                                   | Degrees of freedom | AIC       |
|---------------------------------------------------------------------------------------------------------------------------------------|--------------------|-----------|
| Sample type + habitat type (including edge/core categories) + interaction between sample type and habitat type + sequencing depth     | 11                 | 95356.48* |
| Sample type + habitat type (not including edge/core categories) + interaction between sample type and habitat type + sequencing depth | 7                  | 95365.32  |
| Sample type + habitat type (including edge/core categories) + sequencing depth                                                        | 8                  | 95584.15  |
| Sample type + habitat type (not including edge/core categories) + sequencing depth                                                    | 6                  | 95580.44  |
| Habitat type (including edge/core categories) + sequencing depth                                                                      | 7                  | 113453.66 |
| Habitat type (not including edge/core categories) + sequencing depth                                                                  | 5                  | 113450.02 |
| Sample type + sequencing depth                                                                                                        | 5                  | 95587.84  |
| Sequencing depth                                                                                                                      | 4                  | 113457.13 |

**B. Outputs from the models applied to the DNA abundance data.**

| Fixed effects included in the model                                                                                                   | Degrees of freedom | AIC       |
|---------------------------------------------------------------------------------------------------------------------------------------|--------------------|-----------|
| Sample type + habitat type (including edge/core categories) + interaction between sample type and habitat type + sequencing depth     | 12                 | 782.9658  |
| Sample type + habitat type (not including edge/core categories) + interaction between sample type and habitat type + sequencing depth | 8                  | 780.0033  |
| Sample type + habitat type (including edge/core categories) + sequencing depth                                                        | 9                  | 781.7218  |
| Sample type + habitat type (not including edge/core categories) + sequencing depth                                                    | 7                  | 779.0088* |
| Sample type + sequencing depth                                                                                                        | 6                  | 796.8022  |

## SUPPLEMENTARY FIGURES

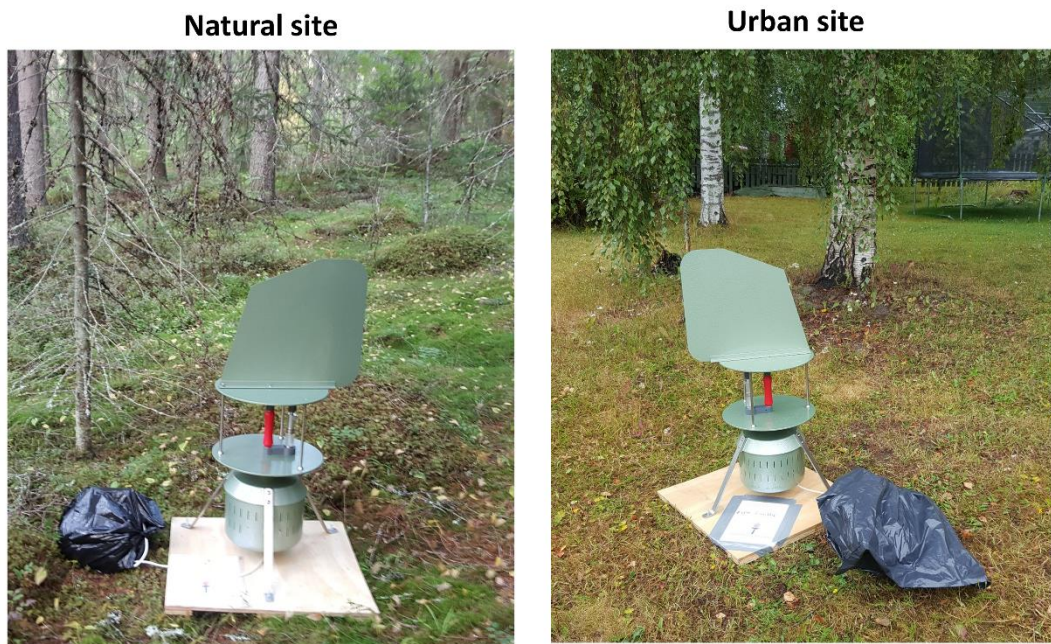

**Supporting Figure 1.** Pictures showing typical habitat types in the natural and urban sampling plots. The pictures were taken in Jyväskylä by Jenna Purhonen.

## SUPPLEMENTARY NOTES

### Technical details of the constrained clustering method

Sequences were considered to be reliable fungi sequences if their PROTAX classification probability (based on the method of Abarenkov et al. 2018) was 0.9 or higher to a known fungi phylum. Here we describe how we applied constrained clustering to these sequences, hierarchically at the taxonomic levels of class, order, family, genus, and species.

In the beginning, the set of parent nodes were known fungi phyla and the clustering started at the class level. At each level, the process consisted of three steps:

- 1) Sequences that were reliably classified by PROTAX (probability 0.9 or higher) into a known taxon of the focal taxonomy level were clustered within their taxon to get representative sequences of the taxa. All reliably classified sequences in the focal level were mapped against the representative sequences in order to define the optimal similarity that delineates whether the sequence belongs to an already existing cluster. As optimality criteria, we required that the amounts of false positives and false negatives were equal. For each taxa, two means were calculated, one from the similarities corresponding to correct and the other from the incorrect classifications. These taxon-specific values were used to obtain a pooled estimate of the threshold, i.e. a shared value among all taxa for each focal level.

2) Sequences that were not reliably classified into a known taxon were mapped against the representative sequences. If the best similarity exceeded the threshold, the sequence was classified to the corresponding taxon.

3) Sequences that were not reliably classified by PROTAX nor mapped to the known class with the required similarity were clustered *denovo*, with the same similarity threshold as was used for mapping in step 2.

In steps 1 and 2 we used LAST for mapping and in steps 1 and 3 we used uclust for clustering. In step 1, clustering threshold was 80%, otherwise the optimal mapping and clustering thresholds were found to be 93%, 93%, 93%, 95%, and 97% for the levels of class, order, family, genus, and species.

The scripts that were used to implement the above described steps are found from the file scripts.zip.

### MCMC convergence of the HMSC models

To evaluate the convergence of the MCMC chains of the HMSC models, we computed the potential scale reduction factors for the parameters measuring the species responses to the fixed effects. The median and (0.025,0.975) quantiles of these were 1.00 (1.00,1.02) for the HMSC-soil, presence-absence; 1.00 (1.00...1.02) for the HMSC-soil, abundance conditional on presence; 1.00 (1.00...1.02) for the HMSC-air, presence-absence; 1.00 (1.00...1.02) for the HMSC-air, abundance conditional on presence. As the potential scale reduction factors are close to one in all cases, the MCMC convergence can be considered satisfactory.

### CONTENTS OF THE PROVIDED DATA FILES

**Interactive version of the Krona wheel shown in Figure 3.** The Krona wheel of Fig. 3 is given as an interactive html-page (Krona\_PooledData.html). Select "Color by TaxonIndex" to show the classification with the following colors:

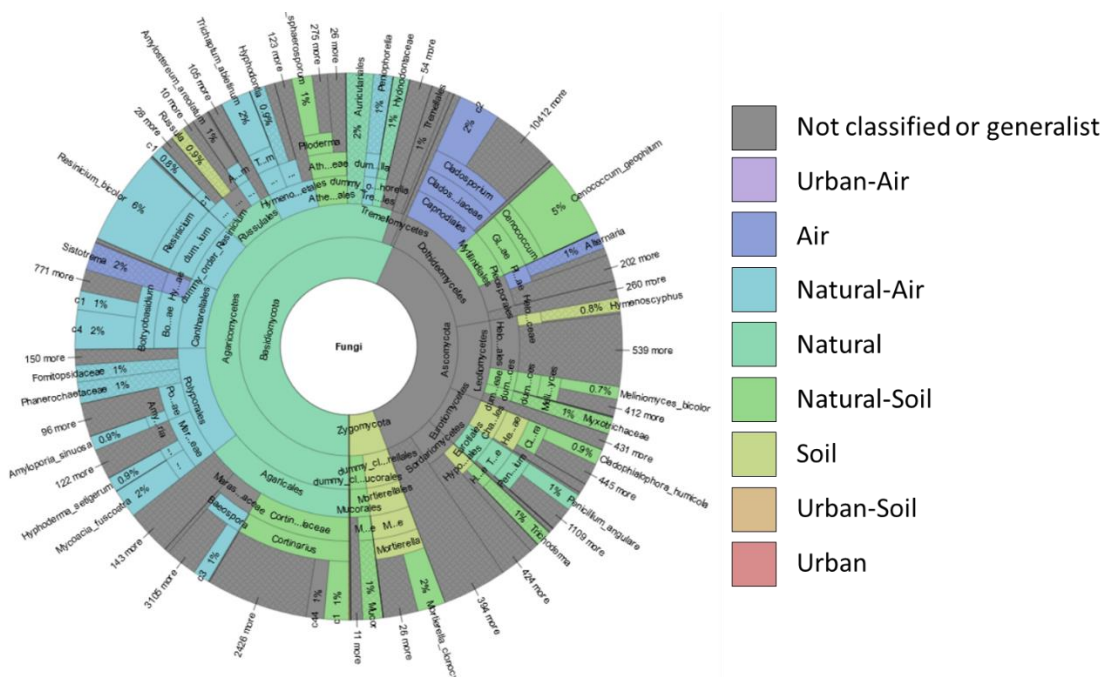



**Interactive version of the Krona wheels shown in Figure 4.** The eight Krona wheels of Fig. 4 is given as an interactive html-pages (e.g. Krona\_AirNaturalCore.html). Select “Color by TaxonIndex” to show the classification with colors used in the interactive version of the Krona wheel shown in Fig. 3.

**Data Table 1. The contents of the Krona wheel shown in Figure 3 as numerical data for the species level.** The file contains the four columns of TAXON, OCCURRENCES, ABUNDANCE and CLASSIFICATION. TAXON contains the well identified levels with Latin names, and de novo clustered levels (see Methods) with cluster IDs. OCCURRENCES shows the number of samples (out of the 174 samples for which at least 10,000 sequences were obtained) from which the taxon is found. ABUNDANCE gives the relative DNA abundance of each taxon, the numbers summing to one over all taxa. CLASSIFICATION corresponds to the classification of nine types illustrated by the colors of the Krona wheel.

**Data Table 2. The contents of the Krona wheel shown in Figure 3 as numerical data for the genus level.** The file contains the four columns of TAXON, OCCURRENCES, ABUNDANCE and CLASSIFICATION. TAXON contains the well identified levels with Latin names, and de novo clustered levels (see Methods) with cluster IDs. OCCURRENCES shows the number of samples (out of the 174 samples for which at least 10,000 sequences were obtained) from which the taxon is found. ABUNDANCE gives the relative DNA abundance of each taxon, the numbers summing to one over all taxa. CLASSIFICATION corresponds to the classification of nine types illustrated by the colors of the Krona wheel.

**Data Table 3. The contents of the Krona wheel shown in Figure 3 as numerical data for the family level.** The file contains the four columns of TAXON, OCCURRENCES, ABUNDANCE and CLASSIFICATION. TAXON contains the well identified levels with Latin names, and de novo clustered levels (see Methods) with cluster IDs. OCCURRENCES shows the number of samples (out of the 174 samples for which at least 10,000 sequences were obtained) from which the taxon is found. ABUNDANCE gives the relative DNA abundance of each taxon, the numbers summing to one over all taxa. CLASSIFICATION corresponds to the classification of nine types illustrated by the colors of the Krona wheel.

**Data Table 4. The contents of the Krona wheel shown in Figure 3 as numerical data for the order level.** The file contains the four columns of TAXON, OCCURRENCES, ABUNDANCE and CLASSIFICATION. TAXON contains the well identified levels with Latin names, and de novo clustered levels (see Methods) with cluster IDs. OCCURRENCES shows the number of samples (out of the 174 samples for which at least 10,000 sequences were obtained) from which the taxon is found. ABUNDANCE gives the relative DNA abundance of each taxon, the numbers summing to one over all taxa. CLASSIFICATION corresponds to the classification of nine types illustrated by the colors of the Krona wheel.

**Data Table 5. The contents of the Krona wheel shown in Figure 3 as numerical data for the class level.** The file contains the four columns of TAXON, OCCURRENCES, ABUNDANCE and CLASSIFICATION. TAXON contains the well identified levels with Latin names, and de novo clustered levels (see Methods) with cluster IDs. OCCURRENCES shows the number of samples (out of the 174 samples for which at least 10,000 sequences were obtained) from which the taxon is found. ABUNDANCE gives the relative DNA abundance of each taxon, the numbers summing to one over all taxa. CLASSIFICATION corresponds to the classification of nine types illustrated by the colors of the Krona wheel.

**Data Table 6. The contents of the Krona wheel shown in Figure 3 as numerical data for the phylum level.** The file contains the four columns of TAXON, OCCURRENCES, ABUNDANCE and CLASSIFICATION. TAXON contains the well identified levels with Latin names, and de novo clustered levels (see Methods) with cluster IDs. OCCURRENCES shows the number of samples (out of the 174 samples for which at least 10,000 sequences were obtained) from which the taxon is found. ABUNDANCE gives the relative DNA abundance of each taxon, the numbers summing to one over all taxa. CLASSIFICATION corresponds to the classification of nine types illustrated by the colors of the Krona wheel.
